# Supplementary material for: Non-use Economic Values for Little-Known Aquatic Species at Risk: Comparing Choice Experiment Results from Surveys Focused on Species, Guilds, and Ecosystems
Source: Springer Nature journal article supplement (doi:10.1007/s00267-016-0716-0), 2016-06-13
Supplement: MOESM2 [file 10256332]

## Supplementary Material S2: Example of a full survey for guilds

**Article title:** Non-use economic values for little-known aquatic species at risk: comparing choice experiment results from surveys focused on species, guilds and ecosystems

**Journal name:** Environmental Management

**Authors:** Murray A. Rudd<sup>1</sup>, Sheri Andres<sup>2\*</sup>, Mary Kilfoil<sup>3,4</sup>

<sup>1</sup>Department of Environmental Sciences, Emory University, Atlanta, USA

<sup>2</sup>Policy and Economics – Central and Arctic Region, Fisheries and Oceans Canada, Winnipeg, Manitoba, Canada

<sup>3</sup>Gardner Pinfold Consulting Economists Ltd., Halifax, Nova Scotia, Canada

<sup>4</sup>Present address: Rowe School of Business, Faculty of Management, Dalhousie University, Halifax, Nova Scotia, Canada

\* Corresponding author: [Sheri.Andres@dfo-mpo.gc.ca](mailto:Sheri.Andres@dfo-mpo.gc.ca)

### DEPARTMENT OF FISHERIES AND OCEANS Conservation of Aquatic Species at Risk in Ontario – Guild Survey FINAL: February 8, 2011

#### Introduction at Site

[INSERT STANDARD PANEL INTRODUCTION]

#### Screening

**S1.** What is your age?

Month / Year of birth [NUMERIC FIELD]

**[TRACK AGE QUOTAS BASED ON S1]**

**S2.** What is your gender?

*Please select one response only*

Male  
Female

**[TRACK GENDER QUOTAS BASED ON S2]**

**S3.** In what country do you live?

*Please select one response only*

USA  
Canada  
Australia  
United Kingdom  
Other

**[CONTINUE IF CANADA, ELSE THANK & TERMINATE]**

**S4.** In which of the following provinces do you reside?

*Please select one response only*

Newfoundland and Labrador  
Prince Edward Island  
Nova Scotia  
New Brunswick  
Quebec  
Ontario  
Manitoba  
Saskatchewan  
Alberta  
British Columbia  
Yukon Territory  
Northwest Territories  
Nunavut

**[CONTINUE IF ONTARIO, ELSE THANK & TERMINATE]**

**S5. ONTARIO REGION [DO NOT ASK – AUTOFILL FROM PANEL INFO]**

GTA  
Southwest Ontario  
Central Ontario  
Eastern Ontario  
Northern Ontario

**[TRACK REGION QUOTAS BASED ON S5]**

**S6.** What was the total income for all members of your household before taxes in 2010?

*Please select one response only*

Less than \$20 000  
\$20,000 to \$39,999  
\$40,000 to \$59,999  
\$60,000 to \$79,999  
\$80,000 to \$99,999  
\$100,000 to \$124,999  
\$125,000 to \$149,999  
\$150,000 or more

**[TRACK INCOME QUOTAS BASED ON S6]**

**PANEL DEMOGRAPHICS [APPEND THE FOLLOWING PANEL INFORMATION]**

Age  
Gender  
FSA

Ontario Region  
CSD (census subdivision) Name  
CMA/CA (Census Metropolitan Area/Census Agglomeration)  
Household Income  
Education  
Employment Status  
Occupation (primary panellist)  
Own or Rent  
Household Size  
Number of Children in the Household  
Marital Status (primary panellist)

**[THIS INFORMATION IS REQUIRED FOR: NON-RESPONDERS, DQs/OVER QUOTA, PARTIAL COMPLETES AND COMPLETES]**

## Conservation of Aquatic Species at Risk in Ontario

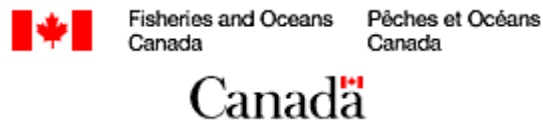

Welcome!

The purpose of this survey is to help government decision-makers better understand the priorities of citizens with regard to the conservation of aquatic (fish, molluscs, reptiles) species at risk in Ontario.

Your participation in this survey is **voluntary** and you may decide to stop participating in the survey at any time. **The information that you provide is important!** We very much appreciate the time and effort you take to complete this survey.

Your answers to the survey will be kept private. Any reports about this study will not identify you in any way. Results will be shown in group form only. None of the personal identifying information you provided to Ipsos when you joined the i-Say panel will be shared with any other individual, organization, or government agency.

## Government Priorities

### Government Priorities

1. The Government of Canada spends money in a wide variety of areas that directly or indirectly help improve the quality of lives of Canadians. Personal income taxes provide over 49% of the funds used to pay for these services and activities (click [here](#) for more information). **[ENSURE THE HYPERLINK OPENS AS A NEW WINDOW]**

**In your opinion, how important is it for the Government of Canada to invest in each of the following factors?** Please use a scale of 1 to 5 where **1** means **not at all important** and **5** means **very important**.

*Please select one response for each item*

[ACROSS TOP OF GRID]

- 1 – Not at all important
- 2
- 3
- 4
- 5 – Very important

[DOWN SIDE OF GRID] [RANDOMIZE ORDER]

- Maintain and build public infrastructure in Canada
- Increase overall economic activity (GDP) in Canada
- Reduce poverty and inequalities in wealth within Canada
- Participate in efforts to reduce conflict and enhance security in Canada and abroad
- Develop an active and vibrant arts and culture sector in Canada
- Improve the physical and mental health of Canadians
- Increase employment opportunities for Canadians
- Increase the number of Canadians graduating from high schools, colleges and universities
- Build social cohesion and trust in Canadian society
- Protect our environment, ecosystems, and biodiversity

## The *Species at Risk Act (SARA)*

A number of aquatic species in Canada are listed as species at risk of extinction. Species at risk are protected under the *Species at Risk Act (SARA)* (2003). SARA protects not only the species themselves but also their habitat. According to this Act, a species becomes more at risk as it passes from **Not At Risk** to **Special Concern** to **Threatened** to **Endangered**.

The figure below defines each of the terms used in SARA.

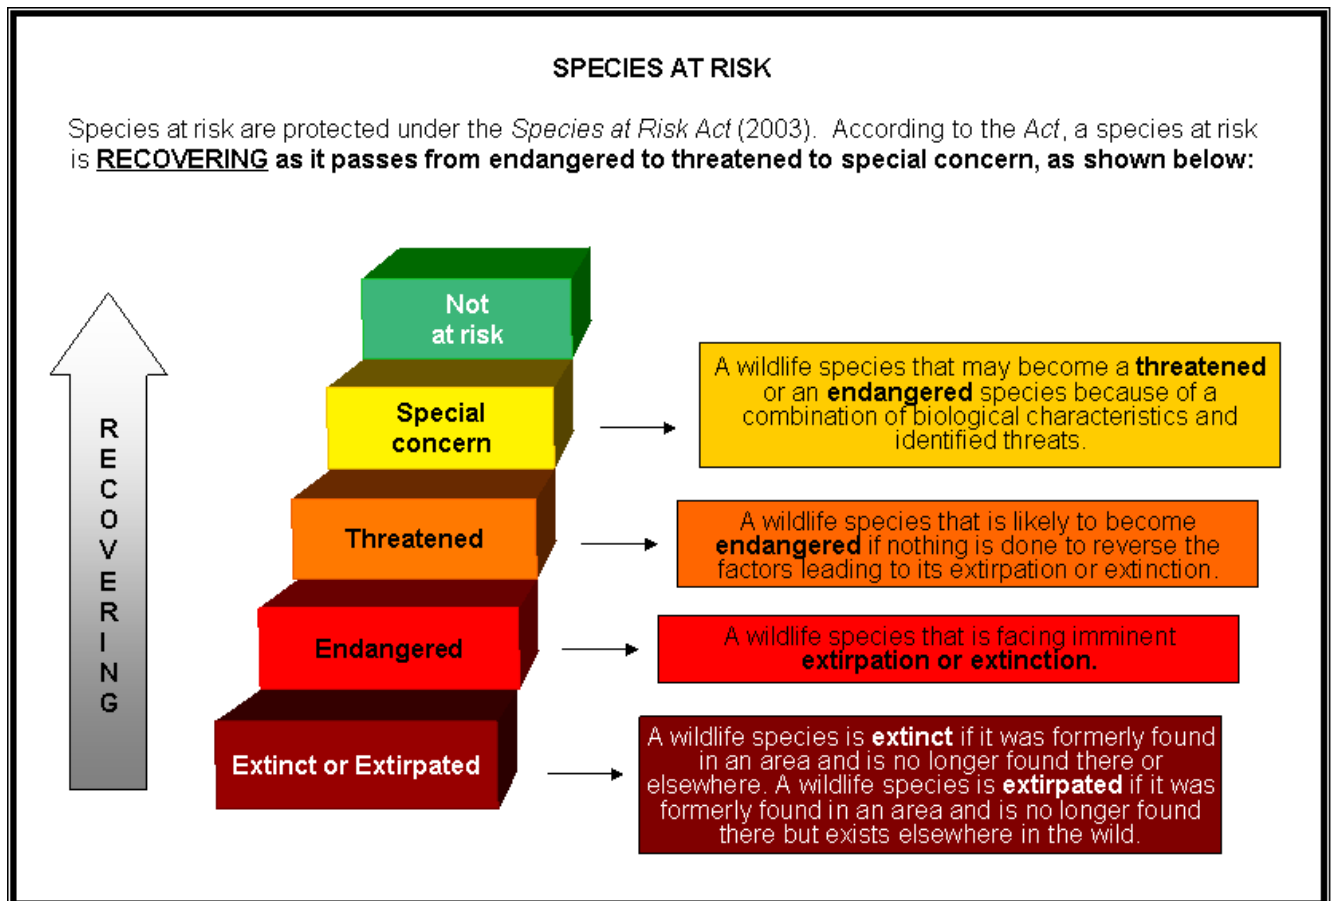

Click [here](#) [**INSERT LINK TO 'SARA Ontario POP-UP' – ENSURE IT OPENS AS A NEW WINDOW.**] for a list of species in Ontario that are already protected under SARA or are under consideration for addition to SARA.

2. Before starting this survey, how familiar were you with the *Species at Risk Act (SARA)*?

*Please select one response only*

Very familiar  
Somewhat familiar  
Not familiar

## Threats to Aquatic Species in Ontario

### Threats to Aquatic Species in Ontario

3. A number of factors could threaten various aquatic species in Ontario. **In your opinion, how important are each of the following potential threats to aquatic species in Ontario?** Please use a scale of 1 to 5 where **1** means **not at all important** and **5** means **very important**.

*Please select one response for each item*

[ACROSS TOP OF GRID]

1 – Not at all important

2

3

4

5 – Very important

Don't know

[DOWN SIDE OF GRID] [RANDOMIZE ORDER]

Water pollution

Recreational fishing

Competition from non-native (invasive) species (e.g. zebra mussels)

Acid rain

Aquaculture (fish farming)

Commercial fishing

Climate change

Habitat loss/degradation from agricultural activities

Habitat loss/degradation from urbanization

Habitat loss/degradation from industrial activities (e.g. oil and gas, forestry and mining exploration/extraction)

Habitat loss/degradation, habitat fragmentation and species mortality/injury from dams and other barriers in rivers and streams

### Threats to Aquatic Species in Ontario

4. Are there **other factors** that you think pose a threat to aquatic species in Canada?

*Please be detailed and specific in your response. You may enter 'No' or 'Don't know.'*

[VERBATIM RESPONSE]

## Species Recovery Investment Preferences

In the latter part of the survey, we are going to show you a series of questions in which you **choose your preferred SARA investment option from two alternatives, plus the option to not invest.**

The SARA investment options may vary in their ultimate impacts on species abundance (population size) and listing status, on species habitat, and on their cost. The options will be described using species groupings (or guilds) that occupy different types of habitats. Information on species guilds and habitats, as well as program costs, follows.

## Riverine Fish Species

The riverine species group is generally tolerant of only a narrow range of habitat characteristics, so **high quality freshwater habitat is important for their survival** in Ontario. This group of species includes:

**(insert riverine fish species image)**

*Photo credits: Eastern Sand Darter – Al Dextrase, Ontario Ministry of Natural Resources; Channel Darter – G. Coker; Spotted Sucker – Konrad Schmidt*

These fish are threatened by the loss of suitable habitat because they are sensitive to sedimentation and decreased water quality caused by agricultural or urban/rural development.

Populations of the species in this guild may stabilize or increase in their native areas when habitat and water quality improve. **Freshwater quality improvement measures**, such as:

- improved farming practices,
  - improved wastewater treatment, and
  - riparian habitat (vegetated area along the sides of a stream) restoration
- would play a particularly important role for riverine species recovery.

Click [here](#) for more information about mitigation measures which could be used to improve water quality. **[ENSURE HYPERLINK OPENS IN A NEW WINDOW]**



**[POP-UP INFORMATION]**

**Riverine Fish Species**

There are numerous best management or mitigation measures which could be used to improve water quality.

- One of the most important practices is the establishment of a riparian buffer (a vegetated area that borders a body of water which helps shade and protect the water body from the impact of adjacent land uses). Stable riverbanks decrease turbidity (a measure of the degree to which the water loses its transparency due to the presence of suspended particles) and sediment loading (the solid material that is transported by a natural agent, especially by a stream) which is beneficial for many fish species. The vegetation also traps nutrients and contaminants such as pesticides and decreases their introduction into the river system. This can be achieved in a number of ways - for example, fencing along a riverbank keeps livestock from the river. In areas farmed for crops, leaving an unplowed area may be all that is required.
- A second important practice is water management. Water that is drained from the land quickly can take with it higher levels of contaminants. Ensuring the water stays on the land, in water management ponds or wetlands can also improve water quality.
- Wastewater treatment facility outflow can also have a negative impact on water quality. New wastewater treatment facilities can be quite expensive, but are not always necessary. Performance evaluation of existing operational activities can result in substantial cost savings with an improvement in water quality.

## Coastal Wetland Fish Species

The second set of impacts of the recovery investment is on the SARA status of a group of [Great Lakes coastal wetland](#) **[INSERT HYPERLINK. INFORMATION FOR POP-UP – ENSURE IT OPENS IN A NEW WINDOW:** Great Lakes coastal wetlands include all wetland types – coastal marshes, temperate swamps, northern bogs – with a direct hydrological connection to the Great Lakes] fish species:

**(insert coastal wetland fish species image)**

*Photo credits: Pugnose Shiner, Lake Chubsucker, Pugnose Minnow and Warmouth - Konrad Schmidt; Spotted Gar – Jason Barnusz, Fisheries and Oceans Canada*

## Coastal Wetland Fish Species

**Coastal lakeshore and wetland habitat is extremely important** for members of the coastal wetlands species guild.

Declines of these fishes have been attributed to their sensitivity to decreases in water clarity, loss of habitat from shoreline development, and destruction of native aquatic vegetation.

The coastal wetland species might be able to repopulate areas when suitable habitat is available. **Coastal wetland rehabilitation programs**, such as:

- wetland purchase,
- wetland preservation, and
- wetland rehabilitation

would play a particularly important role for the recovery of these five species.

Click [here](#) for more information on wetlands purchase, preservation and rehabilitation. **[ENSURE HYPERLINK OPENS IN A NEW WINDOW]**

### **[POP-UP INFORMATION]**

#### **Information on wetlands purchase, preservation and rehabilitation**

Wetlands purchase can include acquiring land through the following methods:

- outright purchase
- land donation
- conservation agreement (a legal agreement in which a landowner agrees to the imposition of restrictions on activities that would threaten the ecological value of the land.)
- relinquishment of land use rights (relinquishment of land use rights (for example mineral or timber rights) held by a private entity, to enable publicly-held land or water to be designated as a protected area.)

Wetlands preservation can include the following actions:

- developing property management plans to document the condition of the land and identify priority actions needed to protect key species and habitats over the long term
- monitoring properties on a regular basis to certify that key natural features remain protected.
- responding to unforeseen threats or issues as they may arise.

Wetlands rehabilitation can include:

- hydrological rehabilitation: re-establishing natural water level variability which may include the use of dykes or new channels for directing water through the wetland
- biological rehabilitation: altering existing habitat to encourage the re-establishment of desirable plants and animals

- chemical or contaminant reduction: reduction at the source (e.g. decreasing fertilizer application to agricultural lands or reducing discharge from a sewage treatment plant) or, in cases where a point source cannot be located, rehabilitation in the wetlands (e.g. capping or carefully removing contaminated sediments).

## Program Cost

So far, we have described the potential benefits to the two fish species guilds arising from new SARA recovery investments. There is, of course, a need to pay for these investments so the final way that the options in the survey differ is in the **cost to your household**.

Assume that the annual costs to your household would be collected via income taxes over the next 20 years.

Assume that the costs specified in each investment option are used entirely for species recovery efforts:

- for members of the **river species group**, money would be spent on targeted initiatives to **improve freshwater quality** in the areas that are crucial for survival of these four species.
- for members of the **coastal wetland species group**, money would be spent on **securing and rehabilitating coastal wetlands** that provide habitat necessary for fish population recovery.

## Trade-Offs

**Previous surveys that have been completed on people's choices concerning paying for government programs usually encounter a difficulty.**

- Most do not view the question in terms of actual behaviour.
- They say that they will act one way but actually do something else if the situation were presented to them in real life.

**Most people say that they are willing to pay a higher price than they would actually pay if the money was actually taken from them in higher taxes.**

- Many scientists believe that this is because respondents do not consider how that money would actually impact a household budget.
- It is easy to be generous when no real money is asked for.

**Also, the government has limited funds but still must protect all species at risk** (click [here](#) [INSERT HYPERLINK TO 'SARA Ontario POP-UP' – ENSURE IT OPENS IN A NEW WINDOW] to see the list of species in Ontario that are already protected under SARA or are under consideration for addition to SARA).

- By protecting Pugnose Shiner, for example, a different species in need of protection may not receive all the money needed.
- A trade-off is therefore being made.

**Every additional species at risk requires a new recovery plan and more money to be spent.**

- Please understand that whatever investment option you choose, the money will not be able to be spent on another species, or on other government priorities such as the economy or health care, unless more money is obtained through taxes.
- You will be making a trade-off by paying for the protection of southern Ontario aquatic species at risk.

## Trade-Offs

The following screens will present **two** SARA investment options, along with a no-investment option, that vary according to the characteristics that were just outlined. **You will be asked which of the two options you would most prefer**, given the anticipated long-term impacts on aquatic species at risk in Ontario and the increased cost to your household.

**Make your choices as if you really had to choose one of these investment options today.**

- That is, if you select an investment option with an annual cost of \$10 per year, you are choosing for your annual taxes to be \$10 higher for the next 20 years in order to fund this option.
- If you would prefer to not have any increase in taxes and see no new investments in aquatic species recovery efforts, choose the "no investment" option.

Remember, these comparisons are hypothetical and are generated by computer (we want to test all possible combinations from the very best to the very worst).

**Assume that all hypothetical combinations are possible** and make your choices accordingly.

**[NEW SCREEN]**

The investments presented may result in the **downward trend continuing**, **small improvements in status** or **large improvements in status** for the **Riverine Fish Species** or the **Coastal Wetland Fish Species**.

| SARA LEVELS                         | RECOVERING →                      |                                    |                                    |                 |             |
|-------------------------------------|-----------------------------------|------------------------------------|------------------------------------|-----------------|-------------|
|                                     | Extirpated                        | Endangered                         | Threatened                         | Special Concern | Not at Risk |
| RIVERINE FISH SPECIES               | Downward Trend Continues          | Small Improvements in Status       | Large Improvements in Status       |                 |             |
| Channel Darter<br>(Threatened)      | Degrades to Endangered Status     | Remains at Threatened Status       | Improves to Special Concern Status |                 |             |
| Eastern Sand Darter<br>(Threatened) | Remains at Threatened Status      | Improves to Special Concern Status | Improves to Special Concern Status |                 |             |
| Spotted Sucker<br>(Special Concern) | Degrades to Threatened Status     | Remains at Special Concern Status  | Improves to No Longer at Risk      |                 |             |
| COASTAL WETLAND FISH SPECIES        | Downward Trend Continues          | Small Improvements in Status       | Large Improvements in Status       |                 |             |
| Pugnose Shiner<br>(Endangered)      | Degrades to Extirpated Status     | Remains at Endangered Status       | Improves to Threatened Status      |                 |             |
| Lake Chubsucker<br>(Threatened)     | Remains at Threatened Status      | Remains at Threatened Status       | Improves to Special Concern Status |                 |             |
| Spotted Gar<br>(Threatened)         | Remains at Threatened Status      | Improves to Special Concern Status | Improves to Special Concern Status |                 |             |
| Pug Minnow<br>(Special Concern)     | Degrades to Threatened Status     | Remains at Special Concern Status  | Improves to No Longer at Risk      |                 |             |
| Warmouth<br>(Special Concern)       | Remains at Special Concern Status | Improves to No Longer at Risk      | Improves to No Longer at Risk      |                 |             |



**[NEW SCREEN]**

**You will now be shown 8 sets of investment options**

- Choose ONLY ONE OPTION on each screen.
- Consider the two options you are shown on EACH SCREEN are the ONLY ones available.
- Each time, please make your choice **independently** from your previous choices – **do not compare options** on different screens.

**PROGRAMMER NOTES:**

- **RANDOMLY ASSIGN RESPONDENT TO BLOCK 1, BLOCK 2 OR BLOCK 3**
- **RANDOMIZE THE ORDER OF THE 8 CHOICE SITUATIONS WITHIN EACH BLOCK**
- **FOR THE DATA FILE, LABEL THE CHOICE SITUATION VARIABLES CS 1 TO 24**
- **CREATE A VARIABLE THAT CAPTURES THE ORDER OF PRESENTATION OF EACH CS [CS1 ORDER, CS2 ORDER, ETC.]**

## **INVESTMENT CHOICE 1**

**Please carefully compare the options presented in the table below.**

**[INSERT TABLE]**

*Please click on the following links to review information about the [Riverine Species Status](#) or the [Coastal Wetlands Species Status](#). [INSERT HYPERLINKS TO TABLES ON PREVIOUS SCREEN. ENSURE INFORMATION OPENS IN A NEW WINDOW.]*

**V1. If you had to select one of these options, which one would you choose?**

**PLEASE SELECT ONE RESPONSE ONLY**

**Investment Option A**  
**Investment Option B**  
**No Investment**

## **INVESTMENT CHOICE 2**

**Please carefully compare the options presented in the table below.**

**[INSERT TABLE]**

*Please click on the following links to review information about the [Riverine Species Status](#) or the [Coastal Wetlands Species Status](#). [INSERT HYPERLINKS TO TABLES ON PREVIOUS SCREEN. ENSURE INFORMATION OPENS IN A NEW WINDOW.]*

**V2. If you had to select one of these options, which one would you choose?**

**PLEASE SELECT ONE RESPONSE ONLY**

**Investment Option A**  
**Investment Option B**  
**No Investment**

### **INVESTMENT CHOICE 3**

**Please carefully compare the options presented in the table below.**

**[INSERT TABLE]**

*Please click on the following links to review information about the [Riverine Species Status](#) or the [Coastal Wetlands Species Status](#). [INSERT HYPERLINKS TO TABLES ON PREVIOUS SCREEN. ENSURE INFORMATION OPENS IN A NEW WINDOW.]*

**V3. If you had to select one of these options, which one would you choose?**

**PLEASE SELECT ONE RESPONSE ONLY**

**Investment Option A**  
**Investment Option B**  
**No Investment**

## **INVESTMENT CHOICE 4**

**Please carefully compare the options presented in the table below.**

**[INSERT TABLE]**

*Please click on the following links to review information about the [Riverine Species Status](#) or the [Coastal Wetlands Species Status](#). [INSERT HYPERLINKS TO TABLES ON PREVIOUS SCREEN. ENSURE INFORMATION OPENS IN A NEW WINDOW.]*

**V4. If you had to select one of these options, which one would you choose?**

**PLEASE SELECT ONE RESPONSE ONLY**

**Investment Option A**  
**Investment Option B**  
**No Investment**

## **INVESTMENT CHOICE 5**

**Please carefully compare the options presented in the table below.**

**[INSERT TABLE]**

*Please click on the following links to review information about the [Riverine Species Status](#) or the [Coastal Wetlands Species Status](#). [INSERT HYPERLINKS TO TABLES ON PREVIOUS SCREEN. ENSURE INFORMATION OPENS IN A NEW WINDOW.]*

**V5. If you had to select one of these options, which one would you choose?**

**PLEASE SELECT ONE RESPONSE ONLY**

**Investment Option A**  
**Investment Option B**  
**No Investment**

## **INVESTMENT CHOICE 6**

**Please carefully compare the options presented in the table below.**

**[INSERT TABLE]**

*Please click on the following links to review information about the [Riverine Species Status](#) or the [Coastal Wetlands Species Status](#). [INSERT HYPERLINKS TO TABLES ON PREVIOUS SCREEN. ENSURE INFORMATION OPENS IN A NEW WINDOW.]*

**V6. If you had to select one of these options, which one would you choose?**

**PLEASE SELECT ONE RESPONSE ONLY**

**Investment Option A**  
**Investment Option B**  
**No Investment**

## **INVESTMENT CHOICE 7**

**Please carefully compare the options presented in the table below.**

**[INSERT TABLE]**

*Please click on the following links to review information about the [Riverine Species Status](#) or the [Coastal Wetlands Species Status](#). [INSERT HYPERLINKS TO TABLES ON PREVIOUS SCREEN. ENSURE INFORMATION OPENS IN A NEW WINDOW.]*

**V7. If you had to select one of these options, which one would you choose?**

**PLEASE SELECT ONE RESPONSE ONLY**

**Investment Option A**  
**Investment Option B**  
**No Investment**



## **INVESTMENT CHOICE 8**

**Please carefully compare the options presented in the table below.**

**[INSERT TABLE]**

*Please click on the following links to review information about the [Riverine Species Status](#) or the [Coastal Wetlands Species Status](#). [INSERT HYPERLINKS TO TABLES ON PREVIOUS SCREEN. ENSURE INFORMATION OPENS IN A NEW WINDOW.]*

**V8. If you had to select one of these options, which one would you choose?**

**PLEASE SELECT ONE RESPONSE ONLY**

**Investment Option A**  
**Investment Option B**  
**No Investment**

## **SARA Investment Choices**

You have now finished the comparisons. Thanks very much for your careful consideration.

## Reasons for Not Choosing SARA Investments

[ASK Q5A IF 'NO INVESTMENT' SELECTED FOR ALL OF THE CHOICE SITUATIONS]

### Reasons for Not Choosing SARA Investments

5. A. You indicated you would not choose any of the SARA investment options. Could you please tell us why?

*Please select **all** reasons that factored into your decision making process at the time.*

[RANDOMIZE ORDER EXCEPT FOR OTHER AND DK]

The cost was too high for the benefits received  
I can't afford to pay any extra now even if there were long-term benefits for everyone  
I do not believe that the program would actually work to increase population numbers  
I do not feel it is my responsibility to pay to protect a species at risk  
Protecting species is not a priority for me  
I don't want more tax added on to what I currently pay  
I do not trust the government to effectively run the program  
I need more information before I can make this choice  
There are better ways to spend public funds  
Other (Please specify)  
Don't know

[IF DON'T KNOW TO Q5A, SKIP TO Q7. IF ONLY ONE RESPONSE SELECTED AT Q5A, AUTOFILL Q5B AND SKIP TO Q7. ALL OTHERS CONITNUE WITH Q5B]

### Reasons for Not Choosing SARA Investments

- 5B. What was the **most important** reason you did not select any of the SARA investment options?

*Please select one response only*

[INSERT ITEMS SELECTED IN Q5A IN THE SAME ORDER OF PRESENTATION]

Don't know

## Reasons for Choosing SARA Investments

[ASK Q6A & B IF INVESTMENT OPTION A OR INVESTMENT OPTION B SELECTED FOR ANY OF THE CHOICE SITUATIONS]

### Reasons for Choosing SARA Investments

6. A. You selected one of the two SARA investment options on at least one occasion. Could you please tell us why?

*Please select **all** reasons that factored into your decision making process at the time.*

[RANDOMIZE ORDER EXCEPT FOR OTHER AND DK]

This is a small amount to pay for the benefits received

I feel that a species at risk should be protected at any cost

It is important to ensure the continuation of the cultural, historical, and environmental significance embodied in that species

It is important to protect the species so that future generations may also enjoy that species

I am more concerned with the overall ecosystem benefits of saving the species rather than the species itself

Other (Please specify)

Don't know

[IF DON'T KNOW TO Q6A, SKIP TO Q7. IF ONLY ONE RESPONSE SELECTED AT Q6A, AUTOFILL Q6B AND SKIP TO Q7. ALL OTHERS CONTINUE WITH Q6B]

### Reasons for Choosing SARA Investments

- 6B. What was the **most important** reason you selected one of the SARA investment options?

*Please select one response only*

[INSERT ITEMS SELECTED IN Q6A IN THE SAME ORDER OF PRESENTATION]

Don't know

## Activity Profile

7. Which of the following activities do you participate in?

*Please select all that apply*

- Swimming/beach activities
- Hiking
- Canoeing/kayaking/rafting/sailing
- Power boating
- Skiing
- Snowmobiling
- Bird watching
- Fishing
- Wildlife viewing
- Mountain biking
- Hunting
- Photographing nature
- Ecotourism
- Whale watching
- ATVing or dirt biking
- Camping
- None of the above**
- Prefer not to answer

8. To which of the following types of organizations do you belong?

*Please select all that apply*

- Fishing or hunting club
- Natural history or bird watching club
- Other environmental or conservation organization
- Outdoor recreation or fitness club
- None of the above**
- Prefer not to answer

## Demographics

The final few questions are for statistical calculations. Please be assured all information will be kept completely confidential.

**9.** For how many years have you lived in Canada?

*Please select one response only*

Born and raised  
More than 20 years  
11 to 20 years  
6 to 10 years  
3 to 5 years  
1 or 2 years  
Less than one year  
Prefer not to answer

**[IF BORN AND RAISED IN CANADA OR DECLINE TO RESPOND IN Q9, SKIP TO Q11]**

**10.** How old were you when you left your country of birth?

*Please select one response only*

Under the age of 12  
12 to 17  
18 or older  
Prefer not to answer

**11.** As you know, we all live in Canada, but our ancestors come from many different ethnic backgrounds. What is the **main** ethnic background of your ancestors?

*Please select one response only*

**South Asian** (from India, Pakistan, Sri Lanka, Bangladesh, or other)  
**Southeast Asian** (from Philippines, Vietnam, Malaysia, Indonesia, Cambodia or other)  
**East Asian** (from China, Hong Kong, Korea, Japan or other)  
**West Asian or Middle Eastern** (from Iran, Afghanistan, Iraq, Lebanon, Israel, Saudi Arabia, United Arab Emirates, Syria, Kazakhstan, or other)  
**Northern European** (from the United Kingdom, Ireland or Scandinavia)  
**Southern European** (from Italy, Greece, Portugal, Spain, Albania, Croatia, Bosnia, Serbia, or other)  
**Western European** (from Germany, Netherlands, Austria, France, Belgium, or other)  
**Eastern European** (from Poland, Romania, former Soviet Republics, Hungary, Czech Republic, Slovakia, or other))  
**African**  
**Central or South American** (from Mexico, El Salvador, Guatemala, Guyana, Colombia, Argentina, Brazil, or other)  
**Caribbean** (from Jamaica, Trinidad and Tobago, Barbados, Granada, or other)

**Canadian  
Aboriginal/First Nations/Métis**

**Other** (Please specify)

Prefer not to answer

**12.** Which of the following best describes where you live?

*Please select one response only*

- Acreage, ranch or farm
- Town of less than 10,000 people
- City with 10,000 to 50,000 people
- City of more than 50,000 people
- Prefer not to answer

**13.** What is the highest level of education you have attained?

*Please select one response only*

- Grade school or some high school
- High school diploma
- Post-secondary technical school
- Some college or university
- College degree or diploma
- University undergraduate degree
- University graduate degree
- Prefer not to answer

**14.** Which of the following best describes your employment status?

*Please select all that apply*

- Working full time (35 hours a week or more)
- Working part time (less than 35 hours a week)
- Student
- Homemaker
- Retired
- Unemployed
- Other
- Prefer not to answer

**15.** How many people aged 18 years of age or older contributed to your total household income in 2010?

*Please select one response only*

- One
- Two
- Three
- Four
- Five
- Six or more
- Prefer not to answer

**[SURVEY CONSIDERED COMPLETE]**

**16.** What are the first three digits of your postal code of your residential address?

*Please enter in **letter number letter** format with no spaces*

TEXT BOX **[ENSURE INPUT IS ALPHA-NUMERIC-ALPHA FORMAT]**

Prefer not to answer

**17.** Do you have any other comments about this survey or the *Species at Risk Act* that you would like to share with us? If so, please use the space below.

[VERBATIM RESPONSE]

**You've now finished the survey - thanks very much for your help!**
